# Supplementary material for: Whole-genome sequencing revealed genetic diversity and selection of Guangxi indigenous chickens
Source: PubMed Central journal article supplement (PMC8923445; doi:10.1371/journal.pone.0250392), 2022-03-15

# PLOS ONE

## Whole genome sequencing revealed genetic diversity and selection of Guangxi indigenous chickens --Manuscript Draft--

|                                                                                                                                                                                                                                                                                          |                                                                                                                                                                                                                                                                                                                                                                                                                                                                                                                                                                                                                                                                                                                                                                                                                                                                                                                                                                                                                                                                                                                                                                              |
|------------------------------------------------------------------------------------------------------------------------------------------------------------------------------------------------------------------------------------------------------------------------------------------|------------------------------------------------------------------------------------------------------------------------------------------------------------------------------------------------------------------------------------------------------------------------------------------------------------------------------------------------------------------------------------------------------------------------------------------------------------------------------------------------------------------------------------------------------------------------------------------------------------------------------------------------------------------------------------------------------------------------------------------------------------------------------------------------------------------------------------------------------------------------------------------------------------------------------------------------------------------------------------------------------------------------------------------------------------------------------------------------------------------------------------------------------------------------------|
| <b>Manuscript Number:</b>                                                                                                                                                                                                                                                                | PONE-D-21-10366                                                                                                                                                                                                                                                                                                                                                                                                                                                                                                                                                                                                                                                                                                                                                                                                                                                                                                                                                                                                                                                                                                                                                              |
| <b>Article Type:</b>                                                                                                                                                                                                                                                                     | Research Article                                                                                                                                                                                                                                                                                                                                                                                                                                                                                                                                                                                                                                                                                                                                                                                                                                                                                                                                                                                                                                                                                                                                                             |
| <b>Full Title:</b>                                                                                                                                                                                                                                                                       | Whole genome sequencing revealed genetic diversity and selection of Guangxi indigenous chickens                                                                                                                                                                                                                                                                                                                                                                                                                                                                                                                                                                                                                                                                                                                                                                                                                                                                                                                                                                                                                                                                              |
| <b>Short Title:</b>                                                                                                                                                                                                                                                                      | WGS revealed genetic diversity and selection of Guangxi chickens                                                                                                                                                                                                                                                                                                                                                                                                                                                                                                                                                                                                                                                                                                                                                                                                                                                                                                                                                                                                                                                                                                             |
| <b>Corresponding Author:</b>                                                                                                                                                                                                                                                             | manman yang<br>BGI-Shenzhen: BGI Group<br>shenzhen, guangdong CHINA                                                                                                                                                                                                                                                                                                                                                                                                                                                                                                                                                                                                                                                                                                                                                                                                                                                                                                                                                                                                                                                                                                          |
| <b>Keywords:</b>                                                                                                                                                                                                                                                                         | Genetic diversity, Guangxi indigenous chicken, WGS                                                                                                                                                                                                                                                                                                                                                                                                                                                                                                                                                                                                                                                                                                                                                                                                                                                                                                                                                                                                                                                                                                                           |
| <b>Abstract:</b>                                                                                                                                                                                                                                                                         | Guangxi chickens play an important role in promoting the high-quality development of the broiler industry in China, but their value and potential are yet to be discovered. To determine the genetic diversity and population structure of Guangxi indigenous chicken, we analyzed the whole genomes of 185 chicken from 8 phenotypically and geographically representative Guangxi chicken breeds, together with 12 RJFt, 12 BRA and 12 WL genomes available from previous studies. Calculation of heterozygosity (Hp), nucleotide diversity ( $\pi$ ), and LD level indicated that Guangxi populations were characterized by higher genetic diversity and lower differentiation than RJFt and commercial breeds except HGFC. Population structure analysis also confirmed the introgression from commercial broiler breeds. Each population clustered together while the overall differentiation was small, MA has the richest genetic diversity among all varieties. Selective sweep analysis revealed BCO2, EDN3 and other candidate genes have received strong selection in local breeds, these also provided novel breeding visual and data basis for future breeding. |
| <b>Order of Authors:</b>                                                                                                                                                                                                                                                                 | manman yang<br>Tao Chen<br>Junli Sun<br>Ran Wang<br>Min Zhu<br>Qiang Wei<br>Yuying Liao<br>Yingfei Huang                                                                                                                                                                                                                                                                                                                                                                                                                                                                                                                                                                                                                                                                                                                                                                                                                                                                                                                                                                                                                                                                     |
| <b>Additional Information:</b>                                                                                                                                                                                                                                                           |                                                                                                                                                                                                                                                                                                                                                                                                                                                                                                                                                                                                                                                                                                                                                                                                                                                                                                                                                                                                                                                                                                                                                                              |
| <b>Question</b>                                                                                                                                                                                                                                                                          | <b>Response</b>                                                                                                                                                                                                                                                                                                                                                                                                                                                                                                                                                                                                                                                                                                                                                                                                                                                                                                                                                                                                                                                                                                                                                              |
| <b>Financial Disclosure</b>                                                                                                                                                                                                                                                              | Yy L, grant number: AA17204024, Guangxi Special Project for innovation-driven development, Yy L played a role in study design and decision to publish.<br>Mm Y, grant number: JCYJ20180307163440037. Shenzhen Municipal Government of China,<br>Mm Y played a role in preparation of the manuscript.                                                                                                                                                                                                                                                                                                                                                                                                                                                                                                                                                                                                                                                                                                                                                                                                                                                                         |
| Enter a financial disclosure statement that describes the sources of funding for the work included in this submission. Review the <a href="#">submission guidelines</a> for detailed requirements. View published research articles from <a href="#">PLOS ONE</a> for specific examples. |                                                                                                                                                                                                                                                                                                                                                                                                                                                                                                                                                                                                                                                                                                                                                                                                                                                                                                                                                                                                                                                                                                                                                                              |
| This statement is required for submission                                                                                                                                                                                                                                                |                                                                                                                                                                                                                                                                                                                                                                                                                                                                                                                                                                                                                                                                                                                                                                                                                                                                                                                                                                                                                                                                                                                                                                              |

and **will appear in the published article** if the submission is accepted. Please make sure it is accurate.

#### Unfunded studies

Enter: *The author(s) received no specific funding for this work.*

#### Funded studies

Enter a statement with the following details:

- Initials of the authors who received each award
- Grant numbers awarded to each author
- The full name of each funder
- URL of each funder website
- Did the sponsors or funders play any role in the study design, data collection and analysis, decision to publish, or preparation of the manuscript?
- **NO** - Include this sentence at the end of your statement: *The funders had no role in study design, data collection and analysis, decision to publish, or preparation of the manuscript.*
- **YES** - Specify the role(s) played.

\* typeset

#### Competing Interests

Use the instructions below to enter a competing interest statement for this submission. On behalf of all authors, disclose any [competing interests](#) that could be perceived to bias this work—acknowledging all financial support and any other relevant financial or non-financial competing interests.

This statement is **required** for submission and **will appear in the published article** if the submission is accepted. Please make sure it is accurate and that any funding sources listed in your Funding Information later in the submission form are also declared in your Financial Disclosure statement.

View published research articles from [PLOS ONE](#) for specific examples.

The authors have declared that no competing interests exist.

**NO authors have competing interests**

Enter: *The authors have declared that no competing interests exist.*

**Authors with competing interests**

Enter competing interest details beginning with this statement:

*I have read the journal's policy and the authors of this manuscript have the following competing interests: [insert competing interests here]*

\* typeset

**Ethics Statement**

Enter an ethics statement for this submission. This statement is required if the study involved:

- Human participants
- Human specimens or tissue
- Vertebrate animals or cephalopods
- Vertebrate embryos or tissues
- Field research

Write "N/A" if the submission does not require an ethics statement.

General guidance is provided below. Consult the [submission guidelines](#) for detailed instructions. **Make sure that all information entered here is included in the Methods section of the manuscript.**

The Animal Experimental Ethical Inspection Form of Guangxi Research Institute reviewed the study protocol, and they approved this research. The approval number is 20190318.

**Format for specific study types**

**Human Subject Research (involving human participants and/or tissue)**

- Give the name of the institutional review board or ethics committee that approved the study
- Include the approval number and/or a statement indicating approval of this research
- Indicate the form of consent obtained (written/oral) or the reason that consent was not obtained (e.g. the data were analyzed anonymously)

**Animal Research (involving vertebrate animals, embryos or tissues)**

- Provide the name of the Institutional Animal Care and Use Committee (IACUC) or other relevant ethics board that reviewed the study protocol, and indicate whether they approved this research or granted a formal waiver of ethical approval
- Include an approval number if one was obtained
- If the study involved *non-human primates*, add *additional details* about animal welfare and steps taken to ameliorate suffering
- If anesthesia, euthanasia, or any kind of animal sacrifice is part of the study, include briefly which substances and/or methods were applied

**Field Research**

Include the following details if this study involves the collection of plant, animal, or other materials from a natural setting:

- Field permit number
- Name of the institution or relevant body that granted permission

**Data Availability**

Authors are required to make all data underlying the findings described fully available, without restriction, and from the time of publication. PLOS allows rare exceptions to address legal and ethical concerns. See the [PLOS Data Policy](#) and [FAQ](#) for detailed information.

Yes - all data are fully available without restriction

A Data Availability Statement describing where the data can be found is required at submission. Your answers to this question constitute the Data Availability Statement and **will be published in the article**, if accepted.

**Important:** Stating 'data available on request from the author' is not sufficient. If your data are only available upon request, select 'No' for the first question and explain your exceptional situation in the text box.

Do the authors confirm that all data underlying the findings described in their manuscript are fully available without restriction?

**Describe where the data may be found in full sentences. If you are copying our sample text, replace any instances of XXX with the appropriate details.**

- If the data are **held or will be held in a public repository**, include URLs, accession numbers or DOIs. If this information will only be available after acceptance, indicate this by ticking the box below. For example: *All XXX files are available from the XXX database (accession number(s) XXX, XXX).*
- If the data are all contained **within the manuscript and/or Supporting Information files**, enter the following: *All relevant data are within the manuscript and its Supporting Information files.*
- If neither of these applies but you are able to provide **details of access elsewhere**, with or without limitations, please do so. For example:

*Data cannot be shared publicly because of [XXX]. Data are available from the XXX Institutional Data Access / Ethics Committee (contact via XXX) for researchers who meet the criteria for access to confidential data.*

*The data underlying the results presented in the study are available from (include the name of the third party*

The raw reads data have been submitted to NCBI Sequence Read Archive database with the accession number PRJNA659069. The data reported in this study are also available in the CNGB Nucleotide Sequence Archive (CNSA: <https://db.cngb.org/cnsa> ; accession number CNP0001716). Furthermore, 36 individuals of commercial breeds and red jungle fowls were downloaded from NCBI at ERP112703 (S2 Table).

|                                                                                                                                                                                                                                         |                                                                                                                                     |
|-----------------------------------------------------------------------------------------------------------------------------------------------------------------------------------------------------------------------------------------|-------------------------------------------------------------------------------------------------------------------------------------|
| <p><i>and contact information or URL).</i></p> <ul style="list-style-type: none"><li>• This text is appropriate if the data are owned by a third party and authors do not have permission to share the data.</li></ul> <p>* typeset</p> |                                                                                                                                     |
| Additional data availability information:                                                                                                                                                                                               | Tick here if your circumstances are not covered by the questions above and you need the journal's help to make your data available. |

# 1 Whole genome sequencing revealed genetic diversity 2 and selection of Guangxi indigenous chickens

3 Junli Sun<sup>1¶</sup>, Tao Chen<sup>2¶</sup>, Min Zhu<sup>1¶</sup>, Ran Wang<sup>2</sup>, Yingfei Huang<sup>1</sup>, Qiang Wei<sup>2</sup>, Manman  
4 Yang<sup>3\*</sup>, Yuying Liao<sup>4\*</sup>

5 <sup>1</sup> Guangxi Key Laboratory of Livestock Genetic Improvement, Animal Husbandry  
6 Research Institute of Guangxi Zhuang Autonomous Region, Nanning 530001, Guangxi,  
7 China.

8 <sup>2</sup> BGI Institute of Applied Agriculture, BGI-Shenzhen, Shenzhen 518120, China.

9 <sup>3</sup> BGI-Shenzhen, Shenzhen 518083, China.

10 <sup>4</sup> Guangxi Veterinary Research Institute, Nanning 530001, Guangxi, China.

11 \*Corresponding author:

12 Manman Yang E-mail: yangmanman@genomics.cn

13 Yuying Liao E-mail: liaoyuying@126.com

## 14 Abstract

15 Guangxi chickens play an important role in promoting the high-quality  
16 development of the broiler industry in China, but their value and potential are yet to be  
17 discovered. To determine the genetic diversity and population structure of Guangxi  
18 indigenous chicken, we analyzed the whole genomes of 185 chicken from 8  
19 phenotypically and geographically representative Guangxi chicken breeds, together  
20 with 12 RJFt, 12 BRA and 12 WL genomes available from previous studies. Calculation  
21 of heterozygosity ( $H_p$ ), nucleotide diversity ( $\pi$ ), and LD level indicated that Guangxi  
22 populations were characterized by higher genetic diversity and lower differentiation  
23 than RJFt and commercial breeds except HGFC. Population structure analysis also  
24 confirmed the introgression from commercial broiler breeds. Each population clustered  
25 together while the overall differentiation was small, MA has the richest genetic diversity  
26 among all varieties. Selective sweep analysis revealed *BCO2*, *EDN3* and other  
27 candidate genes have received strong selection in local breeds, these also provided  
28 novel breeding visual and data basis for future breeding.

## 29 Introduction

30 Chickens are the most widely distributed livestock species globally, more than half  
31 the total (53%) is found in Asia, one of the largest producers is China<sup>[1]</sup>. In China,  
32 poultry meat consumption accounts for the second largest proportion after pork. People  
33 in different regions have different preferences for the appearance, flavor, and cooking  
34 methods of chickens. Indigenous chickens with delicious meat quality and unique  
35 flavors are more in line with the habits and preferences of domestic consumers.

36 Guangxi Zhuang Autonomous Region is in mountainous terrain in the far south of  
37 China, and its unique climate has created unique and rich chicken germplasm resources.  
38 Six breeds are listed in Chinese national catalogue of livestock and poultry genetic  
39 resources includes Guangxi Three-yellow chicken (SHC), Guangxima chicken (MA),  
40 Nandanyao chicken (NDYC), Xiayan chicken (XYC), Guangxiwu chicken (WC),  
41 Longshengfeng chicken (LSFC), and two characteristic populations had a long history  
42 of local breeding are Dongzhongai chicken (DZAC) and Cenxi Gudian chicken (GDC).  
43 These germplasm resources provide good materials for the cultivation of high-quality  
44 chicken breeds and promote the development of poultry industry in Guangxi. However,  
45 only sporadic studies were reported on genomic information about them<sup>[2, 3]</sup>.

46 A comprehensive and deep understanding of the genome diversity of the

47 indigenous breeds could reveal the genetic diversity and population structure of these  
48 breeds. This study therefore investigated genetic diversity, population structure, linkage  
49 disequilibrium (LD), and signature selection within Guangxi indigenous chickens using  
50 genome-wide single nucleotide polymorphisms (SNPs) generated from the whole  
51 genome sequencing.

## 52 **Ethics statement**

53 This study was carried out in accordance with the guidelines of the Animal  
54 Experimental Ethical Inspection Form of Guangxi Research Institute (20190318).

## 55 **Materials and methods**

### 56 **Sampling and genotyping**

57 A total of 185 blood samples from six breeds and two characteristic populations  
58 were investigated from conservation center or breeding farms (S1 Table and S1 Fig)  
59 were collected for genomic DNA extracting. Whole-genome sequencing libraries were  
60 constructed by MGIEasy Universal DNA Library Prep Set and then sequenced using  
61 MGISEQ-2000 with PE100 developed by BGI Genomics Co., Ltd.

### 62 **Variant calling and annotation**

63 After quality control, Pair-end reads were mapped onto the *Gallus gallus* GRCg5.1  
64 using BWA version 0.7.12-r1039<sup>[4]</sup>. The bam files were sorted using SortSam and  
65 duplicated reads were marked using MarkDuplicates from Picard tools version 1.105.  
66 SNPs were detected and filtered using HaplotypeCaller and VariantFiltration command  
67 in GATK version 4.1.1.0. We applied hard filter command 'VariantFiltration' to exclude  
68 potential false-positive variant calls with the parameter "QD < 2.0 || ReadPosRankSum  
69 < -8.0 || FS > 60.0 || MQ < 40.0 || SOR > 3.0 || MQRankSum < -12.5 || QUAL < 30". To  
70 annotate the SNPs and InDels identified here, Vep (v95.3) was employed.

### 71 **Genomic diversity analysis**

72 Genome-wide nucleotide diversity ( $\pi$ ) and genetic differentiation (Fst) was  
73 performed using VCFtools (v0.1.13)<sup>[5]</sup> with parameters 40kb sliding window and 20kb  
74 step size. Individual heterozygosity (Hp) was calculated by following the formula given  
75 by Rubin et al.<sup>[6]</sup>:

$$76 \quad H_p = \frac{2 \sum n_{MAJ} \sum n_{MIN}}{(\sum n_{MAJ} + \sum n_{MIN})^2}$$

77 PopLDdecay version 3.40<sup>[7]</sup> was used to assess patterns in the extent of linkage  
78 disequilibrium. ROH analysis was performed using plink version 1.9, the parameters  
79 were as follows, the minimum length of ROH > 10kb, the number of SNP per window >  
80 20, and only one heterozygote was allowed, ROH had at least one variant per 1000 kb  
81 on average. The results of ROH analysis were visualized with the R package pheatmap,  
82 the total ROHs length of each chromosome was centered and scaled in breed's level.

### 83 **Population structure analysis**

84 To investigate the genetic background of the chickens, principal component  
85 analysis (PCA) and structure analysis were conducted. SNPs in high linkage  
86 disequilibrium were removed by PLINK version 1.9<sup>[8]</sup>, based on the pruned SNP data,  
87 the individual ancestries were estimated using a maximum likelihood method  
88 implemented in ADMIXTURE version 1.23<sup>[9]</sup>. Using the default parameter (folds = 5)  
89 for cross-validation and the lowest cross-validation error was taken as the most  
90 probable K value. VCF2Dis (v1.09) software was used to calculate the P distance  
91 matrix, then use PHYLIPNEW (v3.69) to constructed a NJ-tree.



## 92 Sweep analysis, GO enrichment and KEGG pathway analysis

93 The selective sweep analysis was performed using vcfTools (v0.1.13) in Guangxi  
94 indigenous chickens. Scanning the whole genome selection signal with 40kb as the  
95 sliding window and 20kb as the step size, and windows with less than 10 SNPs are  
96 excluded<sup>[10]</sup>.  $F_{st}$  values were Z-transformed:  $ZF_{st} = \frac{(F_{st} - \mu F_{st})}{\sigma F_{st}}$ , where  $\mu$  is the mean  
97 of  $F_{st}$  and  $\sigma$  is the standard deviation of  $F_{st}$ . The sliding window with the top 1% of the  
98  $ZF_{st}$  value were defined as significant selected region<sup>[11]</sup>. GO enrichment analysis and  
99 KEGG pathway analysis were performed using the packages clusterProfiler, KEGG.db  
100 and org.Gg.eg.db in R. We select Benjamini-Hochberg method correction for multiple  
101 comparisons, and GO terms with a p-value less than 0.05 were considered significantly  
102 enriched.

## 103 Results

### 104 Variant calling and annotation

105 A total of 9.48 billion clean reads were obtained after quality filtering,  
106 corresponding to average depth and coverage is 9.39x and 96.97% (S3 Table). The  
107 overall mapping rate is greater than 98.4%. SNPs with MAF < 0.05, call rate < 0.8 and  
108 individual call rate < 0.9 were excluded, 13,245,769 high-quality SNPs and 3,790,305  
109 indels were utilized for downstream analysis (Fig 1A). The Guangxi indigenous  
110 chickens harbored higher number of SNPs and indels than that of RJFt except for  
111 DZAC, while WL exhibited the lowest ones. Vep was used to annotate SNPs, 55.66%  
112 of these SNPs were aligned to the intron region, 28.43% were aligned to the intergenic  
113 region, and only 2.27% located in the exon region (Fig 1B).

114 The genome is divided into isochrones with a sliding window of 100kb, and  
115 divided into five categories (L1, L2, H1, H2 and H3) according to different GC level to  
116 explore the potential impact between GC content and genetic variations (Fig 1C and  
117 1D)<sup>[12]</sup>. Our results shown that the L2 category has the largest number of isochrones,  
118 covering 37% of the genomic region, and the SNPs and Indels counts peak in this  
119 category. H1 category with higher GC level also contains a lot of genetic variations (S5  
120 Table). In general, genomic regions with moderate GC content contain more variation.

121  
122 **Fig1. The number, distribution, and GC content of SNP and INDEL.** (A) The SNP  
123 and indel number in different breeds. (B) The distribution of SNPs. (C) Scatter plot of  
124 SNP number and GC content in isochrones per 100kb window. (D) Scatter plot of Indel  
125 number and GC content in isochrones per 100kb window.

### 126 Genetic diversity , LD and ROH analysis

127 To provide a more comprehensive understanding and profound insight into the  
128 genome diversity of Guangxi indigenous chickens, we incorporated the sequencing data  
129 of 12 Red jungle fowl population from Thailand (RJFt) and commercial breeds  
130 including 12 white layer (WL) and 12 Broiler A(BRA), which has been previously  
131 published<sup>[13]</sup>. The nucleotide diversity ( $\pi$ ) and heterozygosity were calculated to  
132 evaluate the genetic diversity of all the chicken breeds. We observed Guangxi  
133 indigenous chickens harbored the higher genome-wide  $\pi$  than RJFt ( $\pi = 0.00334$ ) except  
134 for DZAC ( $\pi = 0.00332$ ), the lowest genome-wide  $\pi$  in WL ( $\pi = 0.00152$ ), followed by  
135 BRA ( $\pi = 0.0031$ ) (Fig 2A). Unlike the results in nucleotide diversity, BRA harbored  
136 the highest heterozygous SNP rate ( $H_e$ ), followed by DZAC, while MA harbored the  
137 lowest ( $H_e = 0.1684$ ) one (Fig 2B). The  $H_e$  in Z chromosome are lower than any  
138 autosome among all populations (S2 Fig), probably due to sex chromosome had

139 undergone higher selective pressure than autosome<sup>[14]</sup>. Linkage disequilibrium (LD)  
140 analysis showed that WL population had the slowest LD decay rate, significantly slower  
141 than the followed BRA. MA had a faster LD decay rate than other chicken breeds,  
142 DZAC and WC have similar LD level with RJFt in second group (Fig 2C).

143 The level of **ROH** reflects the recent inbreeding history of a population<sup>[15]</sup>. As  
144 shown in Fig 2D, the average and total length of ROH of indigenous chicken are short,  
145 RJFt had the lowest number of ROH. The difference of mROH among Guangxi breeds  
146 is relatively small (ranging from 37.74 kb to 66.78kb), which is very different from the  
147 largest value of 167.3 kb in WL (S6 Table). HGFC (347.039Mb) had the same tROH  
148 level with BRA (338.084 Mb), and the shortest tROH was observed in LYWC (185.483  
149 Mb).

150  
151 **Fig2. Genome diversity and LD decay of 11 chicken populations.** (A) Genome  
152 nucleotide diversity was calculated with a window size of 40 kb and a step size of 20 kb.  
153 (B) Genome heterozygosity within 500kb sliding window across the genome. (C)  
154 Linkage disequilibrium (LD) decay, denoted with one line for each population. (D) The  
155 ROH of each chromosome in different breeds. The redder color represents longer ROH,  
156 the bluer the shorter.

### 157 **Population genetics analysis**

158 As expected, the chickens from the same breeds clustered together according to  
159 the PCA. The PC1 (26.79% variances explained totally) could separate the commercial  
160 layer breed WL from other populations and PC2 (8.86% variances explained totally)  
161 displayed the genetic differentiation between commercial broiler breed BRA and other  
162 populations except HGFC (Fig 3A). The 12 RJFt gathered with Guangxi fowls and  
163 away from commercial chickens. When WL, BRA, RJFt and HGFC were removed  
164 from the dataset, DZAC and GDC could be identified as separate clusters, the two  
165 populations of LSFC, MC and LSFC, are distributed separately. DZAC and LSFC have  
166 a large variation within breed. MA, SHC and XYC are geographically close and tend  
167 to get closer to each other.

168 PCA results could not completely reproduce the phylogenetic relationships, and  
169 the neighbor-joining tree corroborates the findings of the PCA (Fig 3B). Individuals  
170 from the same breed gathered were consistent with the breeding history and  
171 geographical distribution. Cluster 1 consists of breeds of outgroup background (WL,  
172 BRA and RJFt), and the hybrid HGFC also was grouped together. In cluster 2, WC ,  
173 NDYC and LSFC are grouped together. Following this group, the local populations  
174 DZAC, GDC and several MA were arranged in the middle of the tree, but were not  
175 forming a visually distinct cluster. Cluster 4 consists exclusively of chickens sampled  
176 in MA. Cluster 5 branched into two sub-clusters with SHC and XYC, an individual  
177 from the WC was grouped with XYC, possibly because of a sampling error.

178  
179 **Fig3. Population structure analyses.** (A) Principal component analysis (PCA), with  
180 26.79% and 8.86% variance explained in PC1 and PC2, respectively. (B) Neighbor-  
181 joining tree of 221 chickens, constructed with PHYLIPNEW version 3.69.650 (C)  
182 Admixture analysis with K values running from 3 to 6.

183 To assess historical admixture patterns of the chickens, we conducted the  
184 ADMIXTURE analysis with K values running from 3 to 18. At K=3, genetic  
185 divergency first occurred between commercial breeds and non-commercial ones.  
186 HGFC shared the same ancestral lineage with BRA , Guangxi indigenous breeds shared

187 the same ancestral lineage with RJFt, WL consistent with the above PCA and  
188 phylogenetic tree result (Fig 3C). When K=4, the Guangxi indigenous breeds were  
189 separated from others (except HGFC). Indigenous chickens gradually separated from  
190 each other when K ranged from 5 to 14. MA experienced introgression from SHC, and  
191 the ancestral components of SHC, GDC and HGFC are pure. There is differentiation in  
192 the breeding programs of LYWC and DLWC, as well as in LSFC and XYC breeds (S3  
193 Fig). According to the calculated cross-validation value, the best fit was k=5, Guangxi  
194 indigenous breeds showed two ancestral components that are different from others.

## 195 **Selective Sweep Analysis**

196 The skin color influences consumers' preferences, and the yellow skin chickens  
197 are more popular than white ones in south of China. We observed the highest ZFst  
198 region occurring at chr24: 6.14-6.18 Mb (Fst = 0.63, ZFst = 35.39) between 121 yellow  
199 skin and 64 non-yellow skin chickens. The top ten selected window annotated eight  
200 genes, among which *BCO2* gene is a classical yellow color gene in chicken. Then we  
201 collected the genotypes on this gene and found that the non-yellow skin clusters showed  
202 a different genotypic pattern from LSFC and NDYC; as for WC, it has both two patterns  
203 might due to the concealment of its black skin that the yellow skin has not been  
204 deliberately selected (S4 Fig). We found a missense mutation at chr24: 6155481T>C  
205 (rs313409504) was consisted with the previous report<sup>[16]</sup>. The strongest selective sweep  
206 on chromosome 11 we detected was located at 19.12-19.16Mb (Fst = 0.17, ZFst = 9.41)  
207 near the gene *MC1R*, which plays a key role in controlling the deposition of melanin.  
208

209

**Fig4.** The result of ZFst and Log2(pi) of yellow skin.

210 In oriental countries, nutritional and medicinal benefits have been attributed to the  
211 consumption of black-boned chickens. WC is distinguished compared with other breeds  
212 because of its black beak, crown, skin, and shank. We compared WC with other  
213 Guangxi chickens and scanned the whole genome for selected regions. The strong  
214 selected region contained four annotated functional genes which were associated with  
215 dermal hyperpigmentation in chickens, beta-1 tubulin (*TUBB1*) and *PRELI* domain  
216 containing 3B (*PRELID3B*, also known as *SLMO2*), *GNAS* complex locus (*GNAS*),  
217 encoding endothelin 3 (*EDN3*). GO enrichment analysis shows that gene *TYRP1* on  
218 chromosome Z and *KITLG* on chromosome 1 were significantly enriched in melanocyte  
219 differentiation (GO:0030318) and developmental pigmentation (GO:0048066). *SYK*  
220 gene plays a role in regulation of bone resorption (GO:0045124).

221 XYC and GDC have a similar appearance with SHC, XYC is fat-deposited and  
222 GDC is smaller. We compared them with the SHC and scanned the whole genome for  
223 selected regions related to fat deposition and body size. We found that the selected  
224 genes of fat deposits were located on chromosome 12 and chromosome Z. *HMGCS1*  
225 and *OXCT1* are significantly enriched in the pathway of ketone body synthesis and  
226 degradation (gga00072), ketone bodies are produced in the liver, mainly from the  
227 oxidation of fatty acids, and are exported to peripheral tissues for use as an energy  
228 source. *ATG7* (Autophagy Related 7) is a protein coding gene (gga:04140), it has been  
229 associated with multiple functions, including axon membrane trafficking, axonal  
230 homeostasis, mitophagy, adipose differentiation, and hematopoietic stem cell  
231 maintenance. A significant signal peak was detected at 49.32-49.36Mb on chromosome  
232 5 (ZFst=8.5, Fst = 0.51) located in the *DLK1-DIO3* genomic region, which was  
233 recognized to be an imprinted domain in placental mammals associated with  
234 developmental programming<sup>[17]</sup>.

## Discussion

We assessed the genetic diversity of indigenous chickens from Guangxi provinces using the re-sequencing, meanwhile, we performed selective sweep analysis of phenotypes related to economic traits.

As shown in our study, most Guangxi chicken breed have various genetic diversity on the genome indicated by higher SNPs abundance, slower LD decay rate, lower ROH values and higher heterozygosity. HGFC, as a population of LSFC breed, is an exception, gene introgression from commercial broilers was detected. After further investigation, in order to improve the economic benefit of this group, broilers genes were introduced artificially in the process of breeding. The results of genetic structure are consistent with the origin of breeds, indicating the effectiveness of Guangxi local chicken population in breed protection, even the HGFC also formed its own characteristics because the ancestral composition of it is different from that of BRA when  $k=6$ . Compared with commercial breeds, the genetic difference among indigenous chickens is relatively small, and Guangxi indigenous fowls do have a closer relationship with RJFt<sup>[18]</sup>.

The difference of deposition location and amount of carotenoid and melanin in chicken skin led to the diversity of chicken skin color. *BCO2* gene encodes beta-carotene dioxygenase 2 could cleave colorful carotenoids to colorless apocarotenoids by an asymmetric cleavage reaction<sup>[19]</sup>, is established as the causal gene for the yellow skin. According to the results of selection scanning, *BCO2* gene is extremely strongly selected in the population, and the SNP shows different patterns in the yellow and non-yellow skin population. Eriksson et al. demonstrate that regulatory mutations that inhibit expression of *BCDO2* in skin caused yellow skin, but not in other tissues<sup>[16]</sup>. Fallahshahroudi's study showed the down-regulation of *BCO2* in skin, muscle, and adipose tissue was associated with the derived haplotype<sup>[20]</sup>. Also, *BCO2* has variety variants in different breeds. Wang found a G>A mutation in exon 6 to be associated with the concentration of carotenoids in Guangxi-huang and Qingjiao-ma chicken<sup>[21]</sup>. A GAG haplotype was fixed in commercial breeds of yellow skin<sup>[16]</sup>. We also found the missense mutant at chr24:6155481 led to the mutation of threonine to alanine.

The strongest selective sweep region with dermal hyperpigmentation on chromosome 20 was located at 10.64-10.94 Mb consists of a set of 7 genes. *EDN3* is a gene with a known role in promoting melanoblast proliferation by encoding a potent mitogen for melanoblasts/melanocytes. Shinomiya et al. reported that the overexpression of genes in a 130kb duplication region gives rise to the hyperpigmentation in silk chickens<sup>[22]</sup>, and then Dorshorst et al. extended this discovery and strongly suggested that the increase of *EDN3* expression caused by duplication is the cause of *FM* in all breeds of chickens. The expression of two other genes, *SLMO2*, and *TUBB1* were also significantly increased in expression in both skin and muscle tissue from adult fibromelanosis chickens might contribute to the dermal hyperpigmentation phenotype<sup>[23]</sup>. Analysis of RNA-seq suggested that *SLMO2*, *ATP5e*, and *EDN3* were differentially expressed between the black and yellow skin groups, combined analysis of genomic data found that *EDN3* might interact with the upstream ncRNA *LOC101747896* to generate black skin color during melanogenesis<sup>[24]</sup>. Wang et al. study indicated that a T2270C mutation in *GNAS* gene promoter in chicken is correlated strongly with the skin color traits<sup>[25]</sup>.

*DLK1* has been reported to be associated with the development and differentiation of adipose and muscle in chicken and *DLK1* promotes muscle development inhibitory



283 adipogenesis in mammals<sup>[26]</sup>. Zhang et al.'s study provides strong in vivo evidence that  
284 atg7, and by inference autophagy, is critical for normal adipogenesis<sup>[27]</sup>. *AMACR*  
285 coding protein alpha-methylacyl-CoA racemase, this protein is involved in the pathway  
286 bile acid biosynthesis, which is part of Lipid metabolism (gga00120). Bile acid is the  
287 main component of bile and its main function is to promote the digestion and absorption  
288 of fat. *HSD17B4* codes a bifunctional enzyme mediating dehydrogenation and  
289 anhydration during  $\beta$ -oxidation of long-chain fatty acids, and a non-synonymous SNP  
290 has been reported to be related to meat-quality traits in pig<sup>[28]</sup>. *PRKAA1* is associated  
291 with skeletal muscle lipid accumulation<sup>[29]</sup>.

## 292 **Conclusions**

293 In conclusion, a comprehensive analysis of genetic diversity, population genetic  
294 structure, LD, and the selection signatures of 8 indigenous chicken breeds distributed  
295 in Guangxi. The results suggested that indigenous chickens have abundant genetic  
296 diversity and potential, candidate genes related to economic traits can also provide a  
297 theoretical basis for breeding. Our analyses provide data for further research and local  
298 breeding of Guangxi indigenous chicken.

## 299 **Data availability statement**

300 The raw reads data have been submitted to NCBI Sequence Read Archive database  
301 with the accession number PRJNA659069. The data reported in this study are also  
302 available in the CNGB Nucleotide Sequence Archive (CNSA: <https://db.cngb.org/cnsa> ;  
303 accession number CNP0001716). Furthermore, 36 individuals of commercial breeds  
304 and red jungle fowls were downloaded from NCBI at ERP112703 (S2 Table).

## 305 **Acknowledgments**

306 We would like to thank the members of Guangxi key laboratory of livestock  
307 genetic improvement, BGI Institute of Applied Agriculture, BGI-Shenzhen, and  
308 Guangxi veterinary research institute for helpful input on the project.

## 309 **References:**

- 310 1. Scherf BD, Fao R, Pilling D. The Second Report on the State of the World's Animal Genetic  
311 Resources for Food and Agriculture. 2015.
- 312 2. Liao Y, Mo G, Sun J, Wei F, Liao DJ. Genetic diversity of Guangxi chicken breeds assessed with  
313 microsatellites and the mitochondrial DNA D-loop region. *Mol Biol Rep*. 2016;43(5):415-25.  
314 <http://doi.org/10.1007/s11033-016-3976-0>
- 315 3. Yang Z, Deng J, Li D, Sun T, Xia L, Xu W, et al. Analysis of Population Structure and Differentially  
316 Selected Regions in Guangxi Native Breeds by Restriction Site Associated with DNA Sequencing.  
317 *G3 (Bethesda)*. 2020;10(1):379-86. <http://doi.org/10.1534/g3.119.400827>
- 318 4. Li H, Durbin R. Fast and accurate long-read alignment with Burrows-Wheeler transform.  
319 *Bioinformatics*. 2010;26(5):589-95. <http://doi.org/10.1093/bioinformatics/btp698>
- 320 5. Danecek P, Auton A, Abecasis G, Albers CA, Banks E, DePristo MA, et al. The variant call format  
321 and VCFtools. *Bioinformatics*. 2011;27(15):2156-8. <http://doi.org/10.1093/bioinformatics/btr330>
- 322 6. Rubin CJ, Zody MC, Eriksson J, Meadows JR, Sherwood E, Webster MT, et al. Whole-genome  
323 resequencing reveals loci under selection during chicken domestication. *Nature*.  
324 2010;464(7288):587-91. <http://doi.org/10.1038/nature08832>
- 325 7. Zhang C, Dong SS, Xu JY, He WM, Yang TL. PopLDdecay: a fast and effective tool for linkage  
326 disequilibrium decay analysis based on variant call format files. *Bioinformatics*. 2019;35(10):1786-  
327 8. <http://doi.org/10.1093/bioinformatics/bty875>
- 328 8. Chang CC, Chow CC, Tellier LC, Vattikuti S, Purcell SM, Lee JJ. Second-generation PLINK: rising  
329 to the challenge of larger and richer datasets. *Gigascience*. 2015;4:7. <http://doi.org/10.1186/s13742-015-0047-8>
- 330 9. Alexander DH, Novembre J, Lange K. Fast model-based estimation of ancestry in unrelated  
331 individuals. *Genome Res*. 2009;19(9):1655-64. <http://doi.org/10.1101/gr.094052.109>
- 332 10. Qanbari S, Rubin CJ, Maqbool K, Weigend S, Weigend A, Geibel J, et al. Genetics of adaptation  
333

- 334 in modern chicken. *Plos Genet.* 2019;15(4):e1007989. <http://doi.org/10.1371/journal.pgen.1007989>
- 335 11. Liu LL, Fang C, Liu WJ. Identification on novel locus of dairy traits of Kazakh horse in Xinjiang.  
336 *Gene.* 2018;677:105-10. <http://doi.org/10.1016/j.gene.2018.07.009>
- 337 12. Li D, Li Y, Li M, Che T, Tian S, Chen B, et al. Population genomics identifies patterns of genetic  
338 diversity and selection in chicken. *Bmc Genomics.* 2019;20(1):263. [http://doi.org/10.1186/s12864-](http://doi.org/10.1186/s12864-019-5622-4)  
339 [019-5622-4](http://doi.org/10.1186/s12864-019-5622-4)
- 340 13. Qanbari S, Rubin C, Maqbool K, Weigend S, Weigend A, Geibel J, et al. Genetics of adaptation in  
341 modern chicken. *Plos Genet.* 2019;15(4):e1007989. <http://doi.org/10.1371/journal.pgen.1007989>
- 342 14. Corl A, Ellegren H. The genomic signature of sexual selection in the genetic diversity of the sex  
343 chromosomes and autosomes. *Evolution.* 2012;66(7):2138-49. [http://doi.org/10.1111/j.1558-](http://doi.org/10.1111/j.1558-5646.2012.01586.x)  
344 [5646.2012.01586.x](http://doi.org/10.1111/j.1558-5646.2012.01586.x)
- 345 15. Traspov A, Deng W, Kostyunina O, Ji J, Shatokhin K, Lugovoy S, et al. Population structure and  
346 genome characterization of local pig breeds in Russia, Belorussia, Kazakhstan and Ukraine. *Genet Sel Evol.* 2016;48:16. <http://doi.org/10.1186/s12711-016-0196-y>
- 347 16. Eriksson J, Larson G, Gunnarsson U, Bed'Hom B, Tixier-Boichard M, Stromstedt L, et al.  
348 Identification of the yellow skin gene reveals a hybrid origin of the domestic chicken. *Plos Genet.*  
349 2008;4(2):e1000010. <http://doi.org/10.1371/journal.pgen.1000010>
- 350 17. Da RS, Edwards CA, Ito M, Ogata T, Ferguson-Smith AC. Genomic imprinting at the mammalian  
351 *Dlk1-Dio3* domain. *Trends Genet.* 2008;24(6):306-16. <http://doi.org/10.1016/j.tig.2008.03.011>
- 352 18. Wang MS, Thakur M, Peng MS, Jiang Y, Frantz L, Li M, et al. 863 genomes reveal the origin and  
353 domestication of chicken. *Cell Res.* 2020;30(8):693-701. [http://doi.org/10.1038/s41422-020-0349-](http://doi.org/10.1038/s41422-020-0349-y)  
354 [y](http://doi.org/10.1038/s41422-020-0349-y)
- 355 19. Kiefer C, Hessel S, Lampert JM, Vogt K, Lederer MO, Breithaupt DE, et al. Identification and  
356 characterization of a mammalian enzyme catalyzing the asymmetric oxidative cleavage of  
357 provitamin A. *J Biol Chem.* 2001;276(17):14110-6. <http://doi.org/10.1074/jbc.M011510200>
- 358 20. Fallahshahroudi A, Sorato E, Altimiras J, Jensen P. The Domestic BCO2 Allele Buffers Low-  
359 Carotenoid Diets in Chickens: Possible Fitness Increase Through Species Hybridization. *Genetics.*  
360 2019;212(4):1445-52. <http://doi.org/10.1534/genetics.119.302258>
- 361 21. Wang Y, Gan SY, Luo CL, Liu TF, Zhao XL, Ma J, et al. Variations in BCO2 Coding Sequence  
362 Causing a Difference in Carotenoid Concentration in the Skin of Chickens. *Research Square.* 2020.
- 363 22. Shinomiya A, Kayashima Y, Kinoshita K, Mizutani M, Namikawa T, Matsuda Y, et al. Gene  
364 duplication of endothelin 3 is closely correlated with the hyperpigmentation of the internal organs  
365 (Fibromelanosis) in silky chickens. *Genetics.* 2012;190(2):627-38.  
366 <http://doi.org/10.1534/genetics.111.136705>
- 367 23. Dorshorst B, Molin AM, Rubin CJ, Johansson AM, Stromstedt L, Pham MH, et al. A complex  
368 genomic rearrangement involving the endothelin 3 locus causes dermal hyperpigmentation in the  
369 chicken. *Plos Genet.* 2011;7(12):e1002412. <http://doi.org/10.1371/journal.pgen.1002412>
- 370 24. Li D, Sun G, Zhang M, Cao Y, Zhang C, Fu Y, et al. Breeding history and candidate genes  
371 responsible for black skin of Xichuan black-bone chicken. *Bmc Genomics.* 2020;21(1):511.  
372 <http://doi.org/10.1186/s12864-020-06900-8>
- 373 25. Wang HH, Chen ML, Lou LF, Zhang L, Zhang CX, Chen XH, et al. GNAS gene promoter mutation  
374 in chicken and the correlation with skin color traits. *Acta Veterinaria et Zootechnica Sinica.*  
375 2016;12(47):2354-61.
- 376 26. Shin J, Lim S, Latshaw JD, Lee K. Cloning and expression of delta-like protein 1 messenger  
377 ribonucleic acid during development of adipose and muscle tissues in chickens. *Poult Sci.*  
378 2008;87(12):2636-46. <http://doi.org/10.3382/ps.2008-00189>
- 379 27. Zhang Y, Goldman S, Baerga R, Zhao Y, Komatsu M, Jin S. Adipose-specific deletion of  
380 autophagy-related gene 7 (*atg7*) in mice reveals a role in adipogenesis. *Proc Natl Acad Sci U S A.*  
381 2009;106(47):19860-5. <http://doi.org/10.1073/pnas.0906048106>
- 382 28. Jo JL, Hwang JH, Kwon SG, Park DH, Kim TW, Kang DG, et al. Association between a non-  
383 synonymous HSD17B4 single nucleotide polymorphism and meat-quality traits in Berkshire pigs.  
384 *Genet Mol Res.* 2016;15(4). <http://doi.org/10.4238/gmr15048970>
- 385 29. Wu W, Xu Z, Zhang L, Liu J, Feng J, Wang X, et al. Muscle-specific deletion of *Prkaa1* enhances  
386 skeletal muscle lipid accumulation in mice fed a high-fat diet. *J Physiol Biochem.* 2018;74(2):195-  
387 205. <http://doi.org/10.1007/s13105-017-0604-y>
- 388

## 389 Supporting information

390 **S1 Fig. Geographic distribution and appearances of typical female chickens.**

391 **S2 Fig. Boxplot showing heterozygous SNP rate of autosomes (left) and Z**

392 **chromosome (right) between each chicken population.**  
393 **S3 Fig. Admixture analysis with K values running from 7 to 18.** Each population  
394 separated by white dotted line.  
395 **S4 Fig. The genotype of fixed SNPs in chr24: 6.14Mb~6.18Mb of individuals.** The  
396 row represents the SNP position and the column represents the individual. Light blue  
397 denotes reference alleles while red indicates alternative homozygous alleles, yellow  
398 means heterozygous and dark blue means missing.  
399 **S5 Fig. ZFst values and Log 2 (pi).** (A) WC and other indigenous population. (B)  
400 XYZ and SHC. (C) GDC and SHC  
401 **S1 Table. The character of chickens in this study.**  
402 **S2 Table. The public data information.**  
403 **S3 Table. The sequencing information of samples.**  
404 **S4 Table. The distribution of variant, nucleotide diversity and HE.**  
405 **S5 Table. The distribution of isochrones.**  
406 **S6 Table. ROH of chicken breeds.**  
407 **S7 Table. Selective sweep of dermal hyperpigmentation.**  
408 **S8 Table. Selective sweep of yellow skin.**  
409 **S9 Table. Selective sweep of body size.**  
410 **S10 Table. Selective sweep of fat deposition.**  
411 **S11 Table. Functional gene categories enriched for genes under selection.**  
412 **S12 Table. KEGG pathway analysis of genes.**

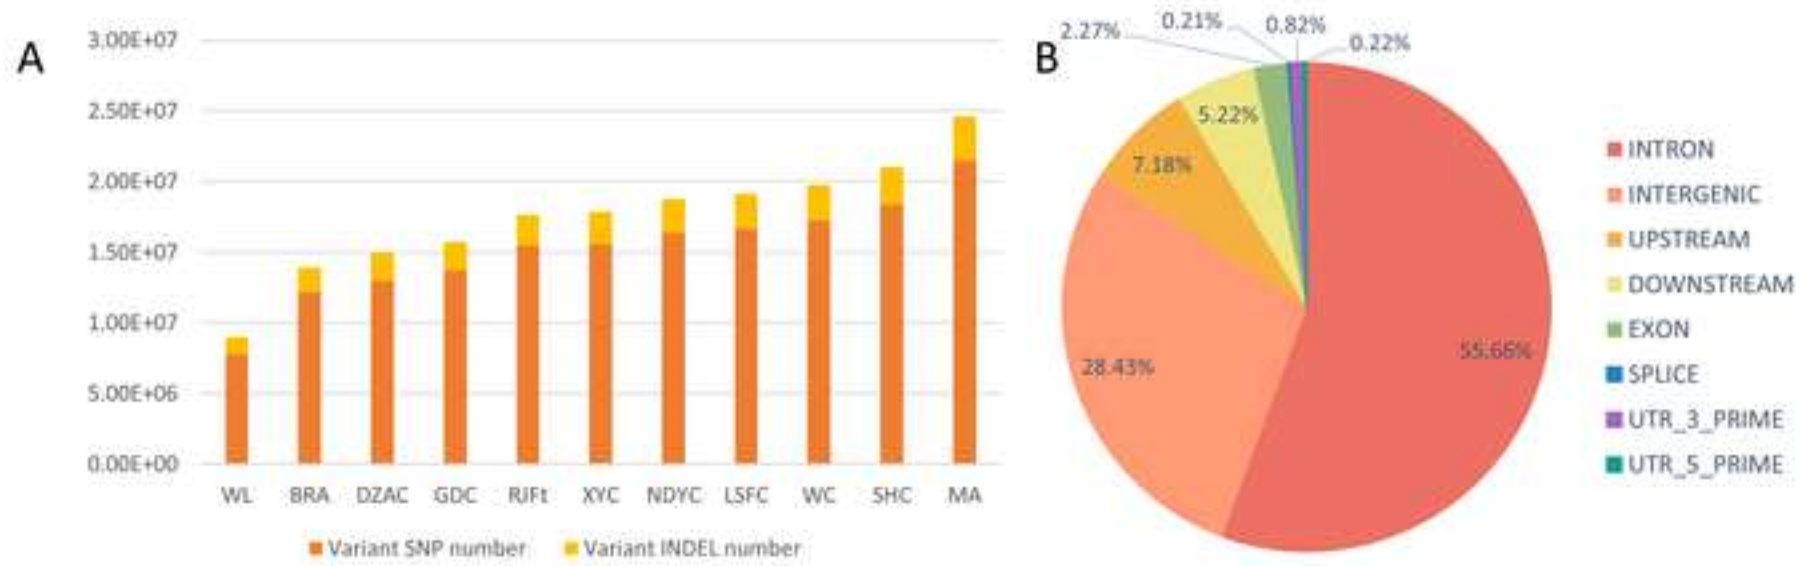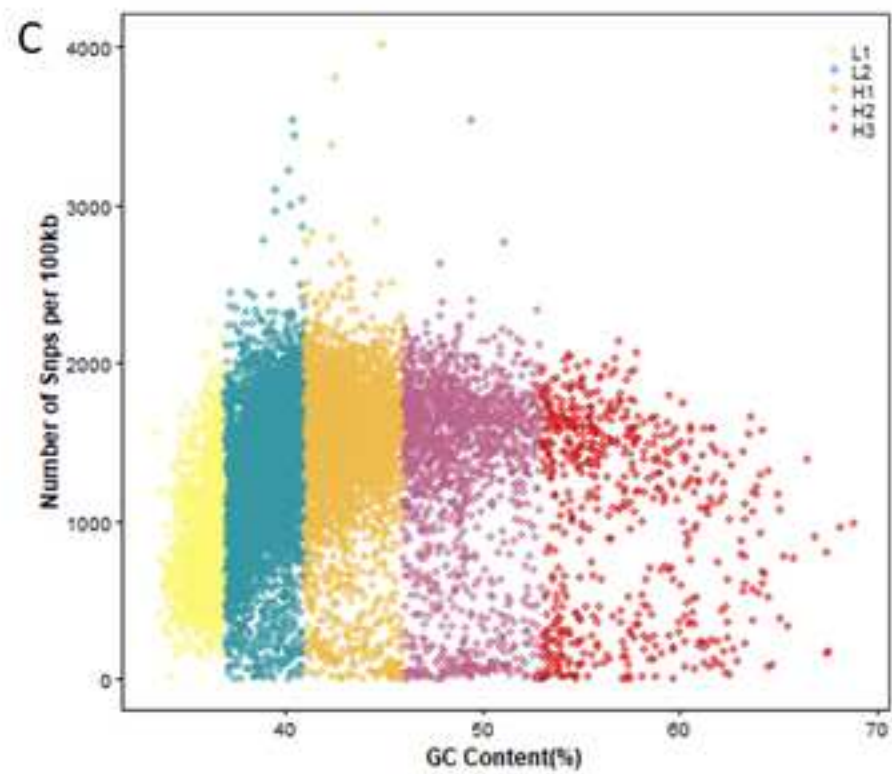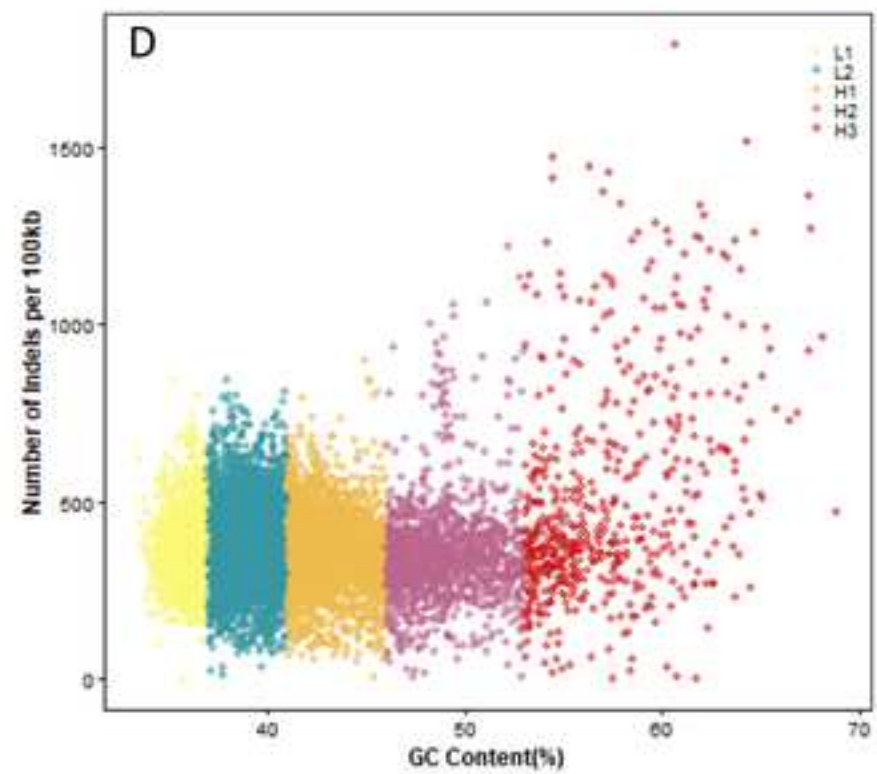



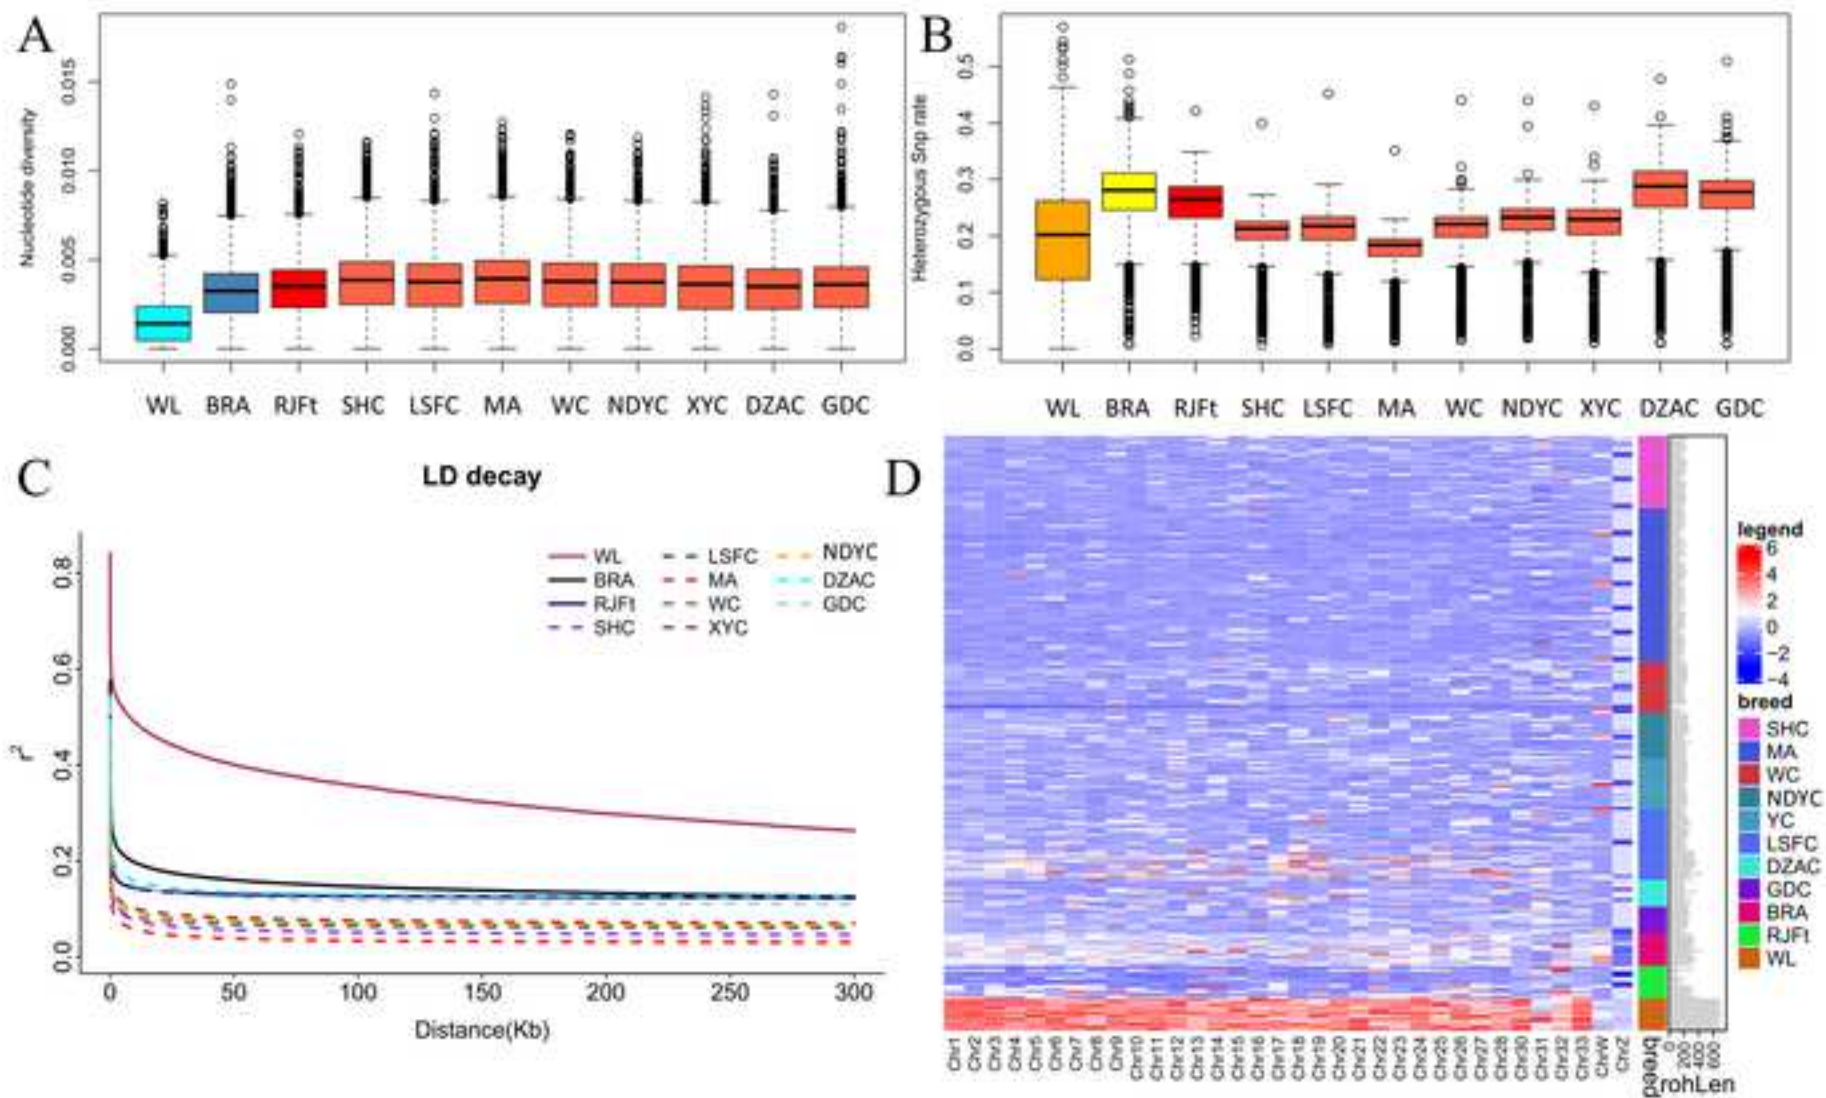

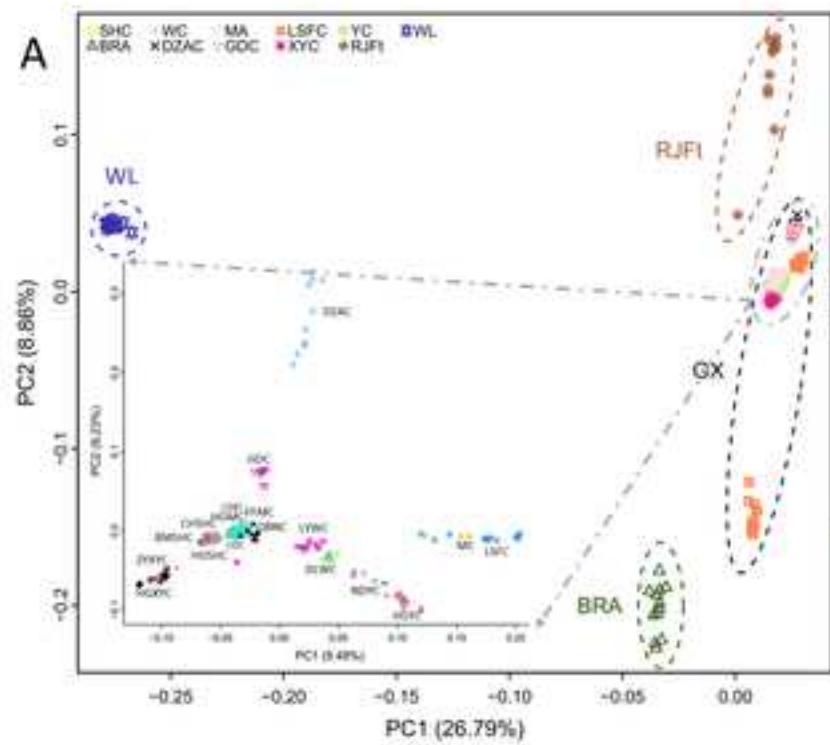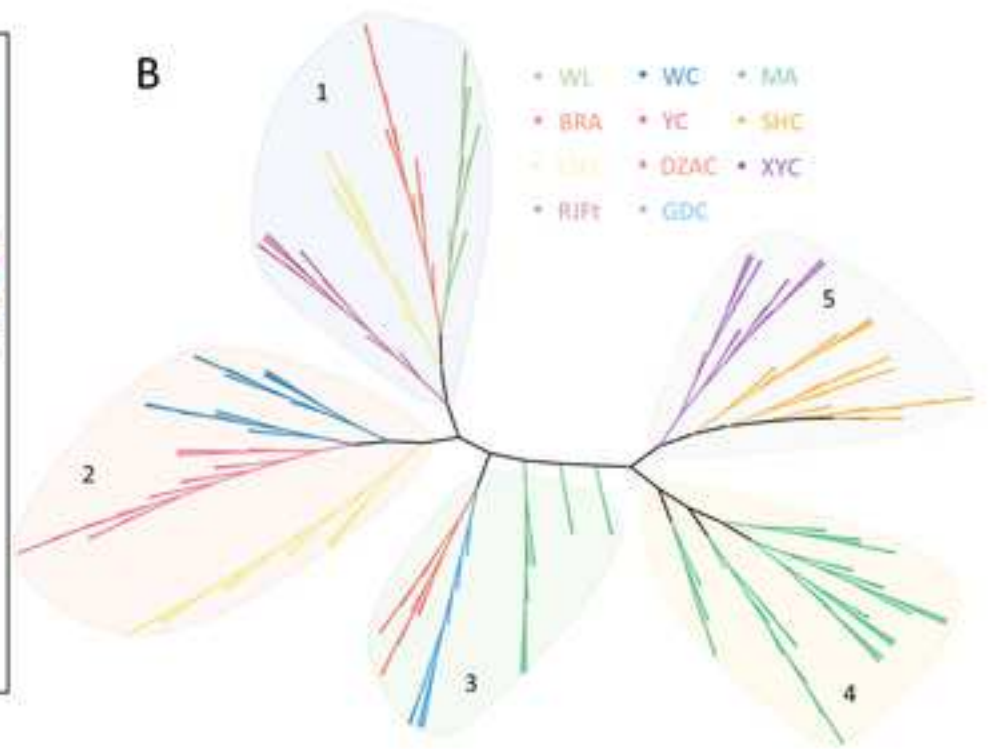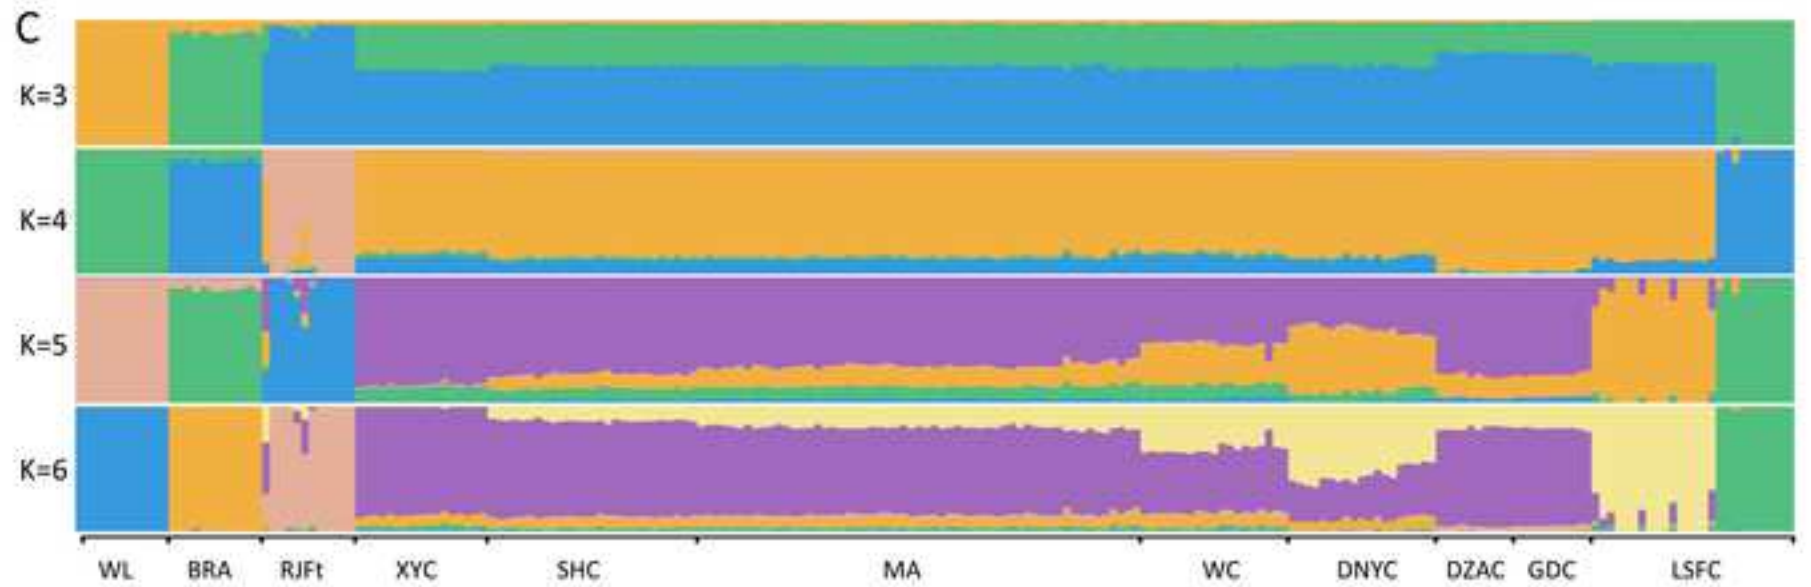

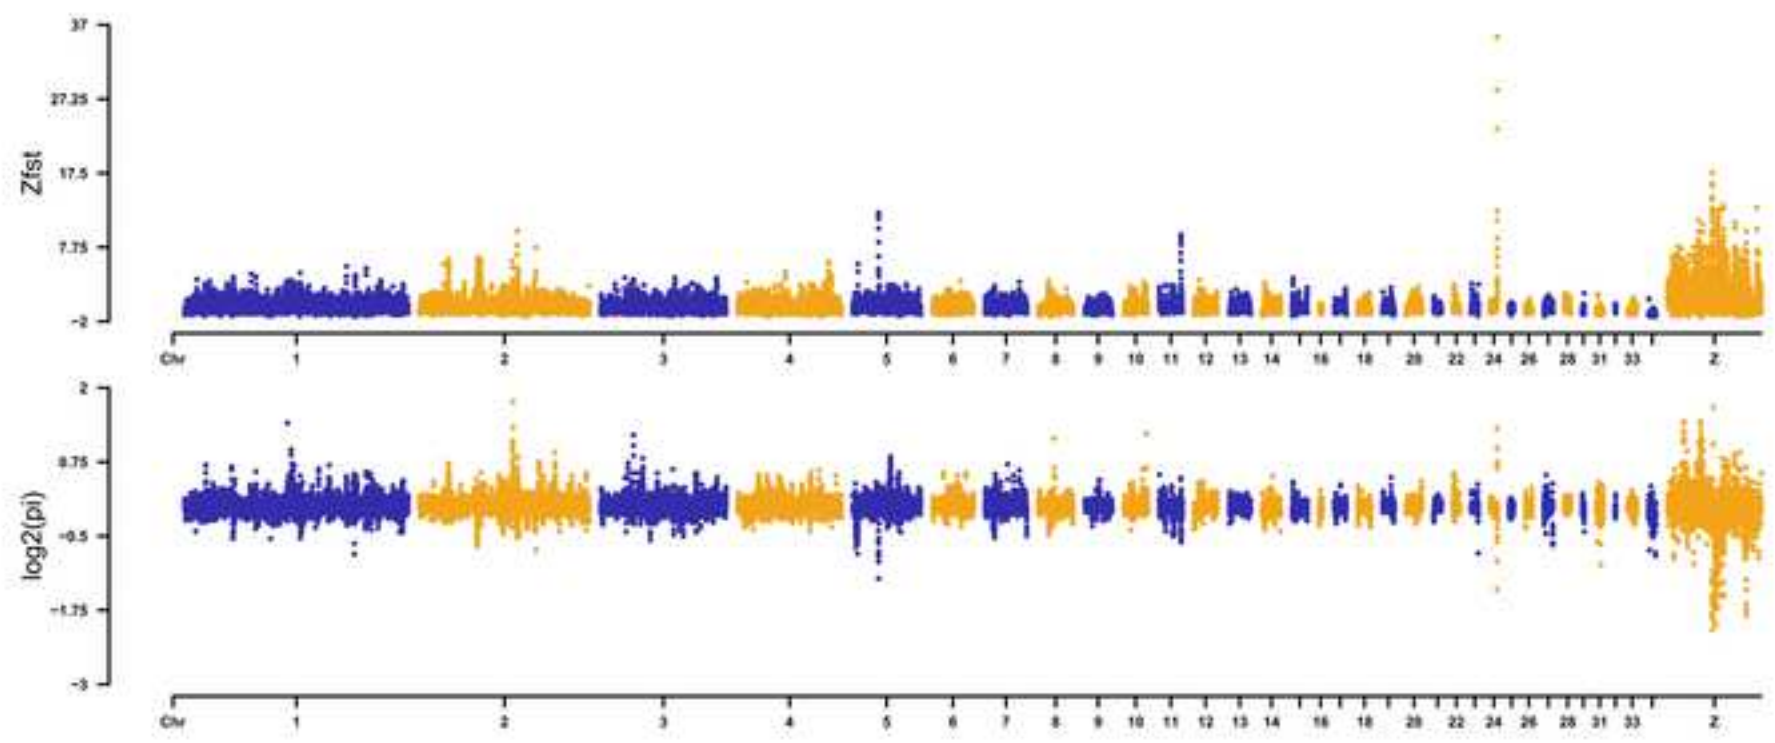

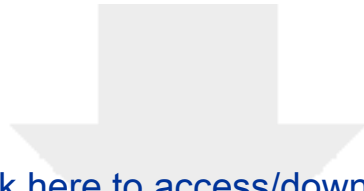

Click here to access/download  
**Supporting Information**  
supplementary information.7z

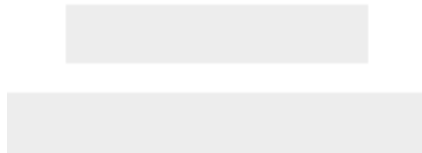

Supplement: pone.0250392.s019.pdf [file pone.0250392.s019.pdf]
